# Supplementary material for: Genetic mapping of semi-polar metabolites in pepper fruits (Capsicum sp.): towards unravelling the molecular regulation of flavonoid quantitative trait loci
Source: PubMed Central journal article supplement (PMC3918126; doi:10.1007/s11032-013-9967-0), 2013-10-23
Supplement: 11032_2013_9967_MOESM5_ESM.pdf [file 11032_2013_9967_MOESM5_ESM.pdf]

**Supplemental Table 4** Putative metabolites associated with a quantitative trait locus

| Putative metabolites                                                 | Metabolite Group <sup>a</sup> | Linkage Group <sup>b</sup> | Position | Max. LOD <sup>c</sup> | mu_A <sup>d</sup> | mu_H <sup>e</sup> | mu_B <sup>f</sup> | Closest marker |
|----------------------------------------------------------------------|-------------------------------|----------------------------|----------|-----------------------|-------------------|-------------------|-------------------|----------------|
| Trihydroxy-phytatetraen-one-acetyl-O-glucose                         | Acy. Diterp.                  | P02                        | 21.00    | 4.4                   | 5.29              | 6.85              | 5.11              | E38M49-457     |
| Quercetin rhamnoside-glucoside                                       | Flav.                         | P02                        | 143.72   | 4.2                   | 5.51              | 7.22              | 7.00              | P17M39-130     |
| 3-Methyl-1-butanol; O-[?-D-Glucopyranosyl-(1?6)-?-D-glucopyranoside] | Ile/leu deriv.                | P03c                       | 12.51    | 3.9                   | 8.20              | 7.17              | 6.27              | P17M32-133     |
| Flavanone tri-methyl glucose pentose                                 | Flav.                         | P06                        | 79.86    | 7.8                   | 5.21              | 5.20              | 5.84              | Epms_376       |
| Icariside E5                                                         | Lignan                        | P06                        | 141.09   | 4.2                   | 8.59              | 9.39              | 8.18              | P11M48-159     |
| Apigenin 6-C-pentoside-8-C-hexoside                                  | Flav.                         | P06                        | 161.35   | 5.6                   | 6.68              | 8.74              | 8.77              | HpmsE088-6b    |
| Apigenin 6,8-di-C-hexoside                                           | Flav.                         | P06                        | 162.35   | 8.7                   | 6.97              | 9.19              | 9.20              | HpmsE088-6b    |
| Luteolin 8-C-hexoside                                                | Flav.                         | P06                        | 165.35   | 3.8                   | 6.28              | 8.13              | 7.95              | HpmsE088-6b    |
| Luteolin 6-C-hexoside                                                | Flav.                         | P06                        | 167.35   | 6.9                   | 7.29              | 9.42              | 9.30              | HpmsE088-6b    |
| capsaicin/capsaicin analogue                                         | Phenylprop.                   | P07                        | 97.03    | 3.7                   | 9.88              | 9.68              | 9.12              | Hpms1-227_Q1   |
| Flavanone tri-methyl glucose pentose                                 | Flav.                         | P07                        | 101.03   | 6.1                   | 7.02              | 5.12              | 5.41              | P17M39-199     |
| Naringenin chalcone                                                  | Flav.                         | P09                        | 13.71    | 6.7                   | 7.96              | 8.72              | 9.86              | Hpms1-3_Q1     |
| Luteolin-methyl-acetyl-apiofuranosyl-hexose                          | Flav.                         | P09                        | 67.86    | 4.1                   | 5.93              | 5.28              | 5.22              | P14M41-408     |
| Capsianoside V                                                       | Acy. Diterp.                  | P09                        | 90.57    | 6.4                   | 5.84              | 10.04             | 10.47             | P11M48-517     |
| Capsianoside IX                                                      | Acy. Diterp.                  | P09                        | 93.57    | 4.2                   | 9.22              | 7.38              | 6.15              | P11M48-517     |
| Capsicoside                                                          | Saponin                       | P09                        | 94.57    | 3.7                   | 7.04              | 5.26              | 5.21              | P11M48-517     |
| Luteolin-methyl-O-di-hexose                                          | Flav.                         | P09                        | 96.57    | 6.5                   | 9.95              | 6.53              | 5.95              | P11M48-517     |
| Capsianoside X-1                                                     | Acy. Diterp.                  | P09                        | 97.57    | 4.3                   | 10.27             | 6.45              | 6.89              | P11M48-517     |
| Capsianoside VIII                                                    | Acy. Diterp.                  | P09                        | 98.57    | 4.6                   | 11.40             | 7.53              | 6.97              | P11M48-517     |
| Quercetin 3-O-rhamnoside                                             | Flav.                         | P10b                       | 7.00     | 4.0                   | 6.28              | 8.31              | 8.24              | E38M49-534     |
| Ferulic acid-hexose II                                               | Phenylprop.                   | P11                        | 23.68    | 4.3                   | 5.90              | 6.77              | 7.01              | Epms_561-11_Q1 |
| Icariside E5                                                         | Lignan                        | P11                        | 42.12    | 6.0                   | 8.08              | 8.91              | 9.51              | Epms_391-11_Q1 |
| Capsianoside IV                                                      | Acy. Diterp.                  | P12b                       | 38.15    | 3.9                   | 8.72              | 6.67              | 5.40              | E32M49-597     |

<sup>a</sup> Metabolites were grouped into flavonoids (Flav.), acyclic diterpenoids (Acy. Diterp.), phenylpropanoids (Phenylprop.), ile/leu derivatives (Ile/leu deriv.), fatty acid derivative (FA deriv.), lignan and saponin

<sup>b</sup> Linkage group was annotated by the chromosome number after the alphabet P and followed by the small alphabet. Linkage map was constructed with AFLP and microsatellite markers as described by Maharajaya et al. (2012b).

<sup>c</sup> LOD = logarithm of odds corresponds to a genome wide confidence level. LOD corresponds to the maximum LOD score.

<sup>d</sup> mu\_A = trait means of AA homozygous P1, *C. annuum* AC1979 (no. 19)

<sup>e</sup> mu\_H = trait means of AB heterozygous progeny

<sup>f</sup> mu\_B = trait means of BB homozygous P2, *C. chinense* No. 4661 Selection (no. 18)

**Supplemental Table 5** Flavonoid QTLs and flavonoid candidate gene expression QTLs in pepper

| Linkage Group <sup>a</sup> | Gene transcript/<br>Metabolite                                | Position | LOD <sup>b</sup> | mu_A <sup>c</sup> | mu_H <sup>d</sup> | mu_B <sup>e</sup> | Locus         |
|----------------------------|---------------------------------------------------------------|----------|------------------|-------------------|-------------------|-------------------|---------------|
| <b>P01</b>                 | <i>Ca-MYB12</i>                                               | 89.63    | 21.9             | 7.56              | 10.68             | 12.47             | Ca-MYB12      |
|                            | <i>CHS-1</i>                                                  | 89.63    | 9.6              | 13.05             | 15.24             | 16.53             | Ca-MYB12      |
|                            | <i>CHS-2</i>                                                  | 89.63    | 9.9              | 13.15             | 15.39             | 16.57             | Ca-MYB12      |
|                            | <i>CHI-2</i>                                                  | 89.63    | 4.6              | 9.99              | 10.65             | 12.35             | Ca-MYB12      |
|                            | <i>FLS</i>                                                    | 89.63    | 3.6              | 6.22              | 7.18              | 7.95              | Ca-MYB12      |
|                            | Naringenin<br>Chalcone                                        | 89.63    | 4.1              | 7.87              | 8.99              | 9.38              | Ca-MYB12      |
| <b>P03c</b>                | <i>F3'H-1</i>                                                 | 40.38    | 9.4              | 12.60             | 15.40             | 16.21             | Epms_386-3_Q1 |
| <b>P04a</b>                | <i>F3'H-3</i>                                                 | 84.17    | 7.61             | 3.19              | 5.70              | 5.97              | P11M48-220    |
| <b>P06</b>                 | <i>FS-2</i>                                                   | 162.13   | 7.8              | 7.79              | 9.08              | 11.08             | FS-2          |
|                            | Apigenin 6- <i>C</i> -<br>pentoside-8- <i>C</i> -<br>hexoside | 162.13   | 9.0              | 6.63              | 8.84              | 8.83              | FS-2          |
|                            | Luteolin 6- <i>C</i> -hexose                                  | 162.13   | 13.9             | 6.78              | 9.64              | 9.54              | FS-2          |
|                            | Luteolin 8- <i>C</i> -hexose                                  | 162.13   | 8.4              | 5.82              | 8.28              | 8.26              | FS-2          |
|                            | Apigenin 6,8-di- <i>C</i> -<br>hexoside                       | 162.13   | 15.3             | 6.86              | 9.28              | 9.33              | FS-2          |
|                            | <i>CHI-4</i>                                                  | 176.82   | 33.0             | 13.13             | 11.67             | 6.15              | CHI-4         |
|                            | <i>FS-2</i>                                                   | 176.82   | 4.5              | 8.20              | 9.03              | 10.48             | CHI-4         |
|                            | Apigenin 6- <i>C</i> -<br>pentoside-8- <i>C</i> -<br>hexoside | 176.82   | 5.0              | 7.21              | 8.61              | 8.81              | CHI-4         |
|                            | Apigenin 6,8-di- <i>C</i> -<br>hexoside                       | 176.82   | 7.7              | 7.53              | 8.98              | 9.31              | CHI-4         |
|                            | Luteolin 6- <i>C</i> -hexose                                  | 176.82   | 6.1              | 7.62              | 9.32              | 9.47              | CHI-4         |
|                            | Luteolin 8- <i>C</i> -hexose                                  | 176.82   | 3.6              | 6.59              | 8.12              | 8.04              | CHI-4         |
| <b>P08</b>                 | <i>F3H</i>                                                    | 23.72    | 3.9              | 11.90             | 12.45             | 13.29             | E38M49-585    |
| <b>P09</b>                 | <i>CHS-1</i>                                                  | 15.08    | 5.8              | 13.99             | 14.56             | 16.34             | E36M48-392    |
|                            | <i>CHS-2</i>                                                  | 15.08    | 5.7              | 14.11             | 14.71             | 16.42             | E36M48-392    |
|                            | <i>CHI-1</i>                                                  | 15.08    | 3.6              | 6.28              | 7.10              | 8.41              | E36M48-392    |
|                            | <i>CHI-2</i>                                                  | 15.08    | 4.2              | 10.31             | 10.35             | 11.75             | E36M48-392    |
|                            | <i>FS-2</i>                                                   | 15.08    | 3.6              | 8.60              | 9.12              | 10.65             | E36M48-392    |
|                            | Naringenin<br>chalcone                                        | 15.08    | 6.6              | 8.00              | 8.68              | 9.77              | E36M48-392    |
|                            | Luteolin methyl<br>acetyl apiofuranosyl<br>hexose             | 67.86    | 4.1              | 5.93              | 5.28              | 5.22              | P14M41-408    |
|                            | Luteolin methyl- <i>O</i> -<br>di-hexose                      | 96.57    | 6.5              | 9.95              | 6.53              | 5.95              | P11M48-517    |

<sup>a</sup> Linkage group was annotated by the chromosome number after the alphabet P and followed by the small alphabet. Linkage map was constructed with AFLP and microsatellite markers as described by Maharajaya et al. (2012b).

<sup>b</sup> LOD = logarithm of odds corresponds to a genome wide confidence level. LOD corresponds to the maximum score at the position of marker

<sup>c</sup> mu\_A = trait means of AA homozygous P1, *C. annuum* AC1979 (no. 19)

<sup>d</sup> mu\_H = trait means of AB heterozygous progeny

<sup>e</sup> mu\_B = trait means of BB homozygous P2, *C. chinense* No. 4661 Selection (no. 18)

The grey boxes indicate the parent of which the trait was derived from

**Supplemental Table 6** Pearson correlation analysis of flavone C-glycosides

| HCA Order | HCA Group | Putative ID                         | Correlation value to Apigenin 6,8-di-C-hexoside (R <sup>2</sup> ) |
|-----------|-----------|-------------------------------------|-------------------------------------------------------------------|
| 249       | D         | Apigenin 6,8-di-C-hexoside          | 1                                                                 |
| 242       | D         | Apigenin 6-C-pentoside-8-C-hexoside | 0.9                                                               |
| 244       | D         | Luteolin 6,8-di-C-hexoside          | 0.7                                                               |
| 245       | D         | Luteolin 6-C-hexoside-8-C-pentoside | 0.6                                                               |
| 246       | D         | Luteolin 6-C-pentoside-8-C-hexoside | 0.6                                                               |
| 248       | D         | Luteolin 8-C-hexoside               | 0.8                                                               |
| 250       | D         | Luteolin 6-C-hexoside               | 0.9                                                               |
